# Supplementary material for: Network Migration Problem: A Hybrid Logic-Based Benders Decomposition Approach
Source: Atypon-hosted journal article supplement (doi:10.1287/ijoc.2023.1280), 2023-03-27
Supplement: ijoc.2023.1280.sm1.pdf [file ijoc.2023.1280.sm1.pdf]

# Online Supplement for “Network Migration Problem: A Hybrid Logic-based Benders Decomposition Approach”

Maryam Daryalal

Department of Decision Sciences, HEC Montréal, Montréal, Québec H3T 2A7, Canada  
maryam.daryalal@hec.ca

Hamed Pouya\*, Marc-Antoine De Santis†

Ciena Canada, Inc.

\*hpouya@ciena.com, †mdesanti@ciena.com

## Appendix A: Detailed Models

### A.1. Compact Formulation For the NMP

With the parameters and decision variables described in Sections 2.2 and 3.3, the compact formulation for the NMP modeled as a CP is as follows:

$$\begin{aligned}
 \min \quad & \text{COST} \sum_{w \in \mathcal{W}} \sum_{r \in \mathcal{R}} \sum_{t \in \mathcal{T}_{rw}} \Delta_{\text{SHIFT}}^{rt} \\
 \text{s.t.} \quad & \sum_{w \in \mathcal{W}} m_{ss'w} \geq \phi_{ss'} && \{s, s'\} \in \mathcal{S}_p, s < s' \\
 & m_{ss'w} = m_{s'sw} && \{s, s'\} \in \mathcal{S}_p, s < s', w \in \mathcal{W} \\
 & \sum_{\{s, s'\} \in \mathcal{S}_p} m_{ss'w} \leq 2\eta^{\text{CIR}} && w \in \mathcal{W} \\
 & \text{NoOverlap}(\text{SEQ}_{rt}, T) && t \in \mathcal{T}_{rw}, r \in \mathcal{R}, w \in \mathcal{W} \\
 & \text{Span}(\text{WTIME}_{rt}, \{x_{rts} : s \in \mathcal{S}_r\}) && t \in \mathcal{T}_{rw}, r \in \mathcal{R}, w \in \mathcal{W} \\
 & \text{IfThen}(\text{PresenceOf}(\text{WTIME}_{rt}), \text{EndOf}(\text{WTIME}_{rt}) \leq \Delta_{\text{SHIFT}}^{rt}) && t \in \mathcal{T}_{rw}, r \in \mathcal{R}, w \in \mathcal{W} \\
 & \text{PresenceOf}(x_{rts}) = \text{PresenceOf}(n_{rts}^s) && s \in \mathcal{S}_r, t \in \mathcal{T}_{rw}, r \in \mathcal{R}, w \in \mathcal{W} \\
 & \text{IfThen}(\text{PresenceOf}(x_{rts}), \text{LengthOf}(x_{rts}) = \theta n_{rts}^s) && s \in \mathcal{S}_r, t \in \mathcal{T}_{rw}, r \in \mathcal{R}, w \in \mathcal{W} \\
 & \sum_{s' : \{s, s'\} \in \mathcal{S}_p} n_{rts s'}^{\text{SP}} = n_{rts}^s && s \in \mathcal{S}_r, t \in \mathcal{T}_{rw}, r \in \mathcal{R}, w \in \mathcal{W}
 \end{aligned}$$

$$\begin{aligned}
n_{rts's'}^{\text{SP}} &= n_{rts's}^{\text{SP}} && \{s, s'\} \in \mathcal{S}_p, t \in \mathcal{T}_{rw}, r \in \mathcal{R}, w \in \mathcal{W} \\
\sum_{r \in \mathcal{R}} \sum_{t \in \mathcal{T}_{rw}} n_{rts's'}^{\text{SP}} &= \bar{m}_{ss'w} && \{s, s'\} \in \mathcal{S}_p, w \in \mathcal{W} \\
\sum_{r \in \mathcal{R}} \sum_{t \in \mathcal{T}_{rw}} \text{PresenceOf}(\text{WTIME}_{rt}) &\leq \alpha^{\text{ENG}} \eta^{\text{ENG}} && w \in \mathcal{W}.
\end{aligned}$$

As stated in the main text, the problem can also be formulated as a MIP, which includes a large number of loop elimination constraints.

## A.2. Auxiliary MIP Pricing Problem

In addition to  $n_{ss'}$  and  $n_{\text{CIR}}$  described in Section 2.2, we define the new decision variables in Table 1. Denote

**Table 1** New decision variables for the CG subproblem

| Variable   | Type   | Description                                                                                                     |
|------------|--------|-----------------------------------------------------------------------------------------------------------------|
| $h_{ss'}$  | Binary | = 1 if the technician migrates at least one circuit endpoint in site $s$ with the other endpoint in site $s'$ . |
| $h_s$      | Binary | = 1 if the technician works in site $s$ in this shift, 0 otherwise.                                             |
| $t_{ss'}$  | Binary | = 1 if a travel from site $s$ to site $s'$ occurs in the shift under construction, 0 otherwise.                 |
| $x_\delta$ | Binary | = 1 if the length of the shift under construction is equal to $\Delta_\delta$ , 0 otherwise.                    |

by  $\bar{\pi}^{(5b)}$ ,  $\bar{\pi}^{(5c)}$ ,  $\pi^{(5d)}$ , the optimal dual solutions associated with constraints (5b), (5c), (5d), respectively.

The pricing problem generating a shift for  $(r, w)$  is:

$$\text{SP}'_{rw}{}^{\text{CG}} = \min \text{COST} \Delta_{\text{SHIFT}} - \sum_{s \in \mathcal{S}_r} \sum_{s' \in \mathcal{S}} n_{ss'} \bar{\pi}_{ss'}^{(5b)} - \bar{\pi}_{rw}^{(5c)} - \bar{\pi}_w^{(5d)} \quad (1a)$$

$$\text{s.t. } h_{ss'} + h_{s's} \leq 1 \quad s, s' \in \mathcal{S}_r, s \neq s' \quad (1b)$$

$$h_s \leq \sum_{s' \in \mathcal{S}} h_{ss'} \leq M h_s \quad s \in \mathcal{S}_r \quad (1c)$$

$$h_{ss'} \leq n_{ss'} \leq M h_{ss'} \quad s \in \mathcal{S}_r, s' \in \mathcal{S}, s \neq s' \quad (1d)$$

$$\sum_{s \in \mathcal{S}_r} t_{s_{\text{SRC}}, s} = 1, \quad \sum_{s \in \mathcal{S}_r} t_{s, s_{\text{DST}}} = 1 \quad (1e)$$

$$t_{ss'} \leq \frac{1}{2}(h_s + h_{s'}) \quad s, s' \in \mathcal{S}_r, s' > s \quad (1f)$$

$$\sum_{\substack{s' \in \mathcal{S}_r^+ \\ s' > s}} t_{ss'} + \sum_{\substack{s' \in \mathcal{S}_r^+ \\ s' < s}} t_{s's} = 2h_s \quad s \in \mathcal{S}_r \quad (1g)$$

$$\sum_{s \in \mathcal{S}_r} \sum_{\substack{s' \in \mathcal{S}_r \\ s' > s}} t_{ss'} = \sum_{s \in \mathcal{S}_r} h_s - 1 \quad (1h)$$

$$\theta \sum_{\substack{s \in \mathcal{S}_r \\ s \neq s'}} \sum_{s' \in \mathcal{S}} n_{ss'} + \sum_{s \in \mathcal{S}_r} \sum_{\substack{s' \in \mathcal{S}_r \\ s' > s}} T_{ss'} t_{ss'} \leq \Delta_{\text{SHIFT}} \quad (1i)$$

$$\sum_{\delta \in \Delta} x_\delta = 1 \quad (1j)$$

$$\sum_{\delta \in \Delta} \Delta_\delta x_\delta = \Delta_{\text{SHIFT}} \quad (1k)$$

$$n_{ss'}, h_{ss'} \in \mathbb{Z}_+, h_s \in \{0, 1\} \quad s \in \mathcal{S}_r, s' \in \mathcal{S}, s \neq s' \quad (1l)$$

---

where  $M \geq 0$  is a large number and  $\mathcal{S}^+ = \mathcal{S} \cup \{s_{\text{SRC}}, s_{\text{DST}}\}$ ,  $\mathcal{S}_r^+ = \mathcal{S}_r \cup \{s_{\text{SRC}}, s_{\text{DST}}\}$ .  $s_{\text{SRC}}$  and  $s_{\text{DST}}$  are two dummy sites introduced as the beginning and end of a path. Objective function (1a) is the reduced-cost. Constraints (1b) ensure that at most one of the endpoints of every circuit  $c \in \mathcal{C}_{ss'}$  can be migrated in every shift. Constraints (1c) determine the sites where a technician works in the current shift. Constraints (1d) assure that all migrated circuit endpoints are from the sites where the technician works in the current shift. Thanks to constraints (1e), generated path in this configuration starts form dummy site  $s_{\text{SRC}}$  and ends in dummy site  $s_{\text{DST}}$ . Constraints (1f) guarantee that if a travel occurs between the two sites  $s$  and  $s'$ , the technician works in both. Constraints (1g) determine the sites visited before and after every site  $s \in \mathcal{S}_r$ . Constraint (1h) ensures that we have a path linking all visited sites. Constraint (1i) makes sure that the shift duration does not exceed the maximum predefined duration. Constraints (1j) and (1k) together determine the duration of the shift. The rest of the constraints determine the variables domain.

## Appendix B: Detailed Numerical Results

**Table 2** Characteristics of instances

| Dataset     | Instance  |                   |           |                   |           |                   |           |                   |           |                   |           |                   |
|-------------|-----------|-------------------|-----------|-------------------|-----------|-------------------|-----------|-------------------|-----------|-------------------|-----------|-------------------|
|             | 1         |                   | 2         |                   | 3         |                   | 4         |                   | 5         |                   | 6         |                   |
|             | Endpoints | $ \mathcal{S}_p $ |
| EUNETWORKS5 | 66        | 27                | 60        | 26                | 46        | 22                | 66        | 26                | 66        | 30                | 66        | 32                |
| EUNETWORKS6 | 70        | 30                | 72        | 32                | 84        | 31                | 88        | 34                | 80        | 33                | 74        | 28                |
| EUNETWORKS7 | 98        | 40                | 84        | 36                | 94        | 34                | 80        | 35                | 90        | 39                | 86        | 35                |
| EUNETWORKS8 | 116       | 41                | 94        | 40                | 110       | 43                | 102       | 38                | 106       | 42                | 108       | 39                |
| EUNETWORKS9 | 110       | 46                | 150       | 44                | 112       | 45                | 112       | 41                | 104       | 42                | 104       | 42                |
| NEXTGEN5    | 54        | 26                | 52        | 23                | 56        | 26                | 74        | 31                | 66        | 31                | 56        | 26                |
| NEXTGEN6    | 86        | 39                | 62        | 26                | 88        | 34                | 80        | 34                | 96        | 39                | 74        | 35                |
| NEXTGEN7    | 82        | 36                | 86        | 35                | 90        | 35                | 92        | 37                | 92        | 35                | 78        | 31                |
| NEXTGEN8    | 122       | 46                | 126       | 47                | 108       | 44                | 92        | 35                | 118       | 44                | 98        | 40                |
| NEXTGEN9    | 134       | 45                | 126       | 51                | 106       | 41                | 124       | 45                | 114       | 45                | 98        | 44                |
| PIONIER5    | 78        | 38                | 82        | 39                | 70        | 35                | 90        | 39                | 98        | 43                | 74        | 36                |
| PIONIER6    | 112       | 48                | 112       | 48                | 106       | 51                | 106       | 47                | 96        | 40                | 104       | 42                |
| SAGO5       | 76        | 35                | 64        | 29                | 88        | 39                | 74        | 33                | 82        | 35                | 90        | 39                |
| SAGO6       | 86        | 37                | 94        | 40                | 94        | 40                | 80        | 32                | 86        | 38                | 90        | 40                |
| SAVVIS5     | 72        | 35                | 98        | 42                | 102       | 41                | 80        | 36                | 54        | 25                | 86        | 40                |
| SAVVIS6     | 104       | 40                | 90        | 40                | 84        | 40                | 106       | 41                | 88        | 38                | 94        | 40                |
| SAVVIS7     | 120       | 46                | 106       | 44                | 88        | 37                | 114       | 47                | 114       | 45                | 92        | 39                |
| VISIONNET5  | 86        | 40                | 100       | 47                | 104       | 45                | 88        | 38                | 102       | 44                | 82        | 36                |
| VISIONNET6  | 116       | 52                | 106       | 51                | 120       | 52                | 120       | 47                | 126       | 52                | 110       | 49                |

**Table 3** Impact of the CG subproblem formulation on the overall performance of the method

| Dataset     | CP-sub   |                   |         | MIP-sub  |                   |         |
|-------------|----------|-------------------|---------|----------|-------------------|---------|
|             | Time (s) |                   | Gap (%) | Time (s) |                   | Gap (%) |
|             | CG       | MP <sup>LBB</sup> |         | CG       | MP <sup>LBB</sup> |         |
| EUNETWORKS5 | 4184.5   | 4192.2            | 0.0%    | Timeout  | Timeout           | 18.0%   |
| NEXTGEN5    | 304.2    | 305.8             | 0.0%    | Timeout  | Timeout           | 21.0%   |
| PIONIER5    | Timeout  | Timeout           | 47.4%   | Timeout  | Timeout           | 47.4%   |
| SAGO5       | Timeout  | Timeout           | 31.6%   | Timeout  | Timeout           | 52.5%   |
| SAVVIS5     | 1219.7   | 1257.3            | 0.0%    | Timeout  | Timeout           | 26.0%   |
| VISIONNET5  | Timeout  | Timeout           | 50.0%   | Timeout  | Timeout           | 23.1%   |

**Table 4 Breakdown of solution times**

| Dataset     | Iterations |          | Sol Time |          | LBBD MP Time |          | CG Time |          | CP Time |          |
|-------------|------------|----------|----------|----------|--------------|----------|---------|----------|---------|----------|
|             | Mean       | CI width | Mean     | CI width | Mean         | CI width | Mean    | CI width | Mean    | CI width |
| EUNETWORKS5 | 3.5        | 0.6      | 1124.1   | 268.6    | 548.2        | 198.3    | 540.1   | 196.0    | 575.8   | 147.6    |
| EUNETWORKS6 | 10.5       | 4.3      | 4607.1   | 2309.7   | 2953.3       | 1929.8   | 2939.2  | 1928.9   | 1653.5  | 680.5    |
| EUNETWORKS7 | 6.5        | 2.0      | 1459.0   | 509.7    | 45.7         | 23.4     | 27.6    | 13.7     | 1413.2  | 497.5    |
| EUNETWORKS8 | 7.3        | 1.6      | 2582.6   | 539.9    | 693.8        | 271.9    | 531.6   | 225.2    | 1888.4  | 563.5    |
| EUNETWORKS9 | 10.8       | 6.1      | 5109.8   | 3376.7   | 2201.9       | 1889.0   | 1384.5  | 1000.8   | 2907.4  | 1817.8   |
| NEXTGEN5    | 6.0        | 3.0      | 699.2    | 560.3    | 18.0         | 16.1     | 4.6     | 2.7      | 680.9   | 561.0    |
| NEXTGEN6    | 4.8        | 2.3      | 675.7    | 374.2    | 94.8         | 42.8     | 17.6    | 6.3      | 580.8   | 361.1    |
| NEXTGEN7    | 5.3        | 2.0      | 997.9    | 415.8    | 177.6        | 63.9     | 32.9    | 15.0     | 820.1   | 381.1    |
| NEXTGEN8    | 8.2        | 4.1      | 2445.6   | 399.6    | 1182.4       | 626.9    | 135.9   | 66.9     | 1262.8  | 433.9    |
| NEXTGEN9    | 8.0        | 2.9      | 3120.4   | 1939.1   | 1980.7       | 1546.1   | 67.1    | 42.6     | 1139.5  | 543.4    |
| PIONIER5    | 5.7        | 1.6      | 1817.2   | 796.4    | 812.9        | 505.1    | 726.2   | 475.5    | 1004.1  | 322.2    |
| PIONIER6    | 9.2        | 2.0      | 4929.4   | 1385.8   | 3267.2       | 1306.1   | 2961.9  | 1167.6   | 1661.8  | 272.9    |
| SAGO5       | 8.3        | 2.3      | 2387.6   | 697.1    | 836.1        | 293.6    | 748.0   | 319.1    | 1551.2  | 480.3    |
| SAGO6       | 5.7        | 2.3      | 3635.1   | 2640.4   | 2630.0       | 2194.2   | 2473.5  | 2132.5   | 1005.0  | 490.1    |
| SAVVIS5     | 4.5        | 1.4      | 619.6    | 475.2    | 400.5        | 408.2    | 27.1    | 12.1     | 218.8   | 94.4     |
| SAVVIS6     | 6.0        | 1.6      | 855.6    | 460.3    | 608.2        | 393.2    | 36.1    | 15.3     | 247.1   | 108.7    |
| SAVVIS7     | 6.0        | 3.7      | 2472.6   | 2731.3   | 2184.8       | 2503.3   | 96.2    | 108.1    | 287.3   | 251.1    |
| VISIONNET5  | 5.8        | 3.5      | 2259.2   | 899.9    | 1217.2       | 523.3    | 1112.4  | 507.2    | 1041.8  | 541.1    |
| VISIONNET6  | 7.3        | 3.1      | 3308.0   | 769.4    | 1759.4       | 718.7    | 139.2   | 36.3     | 1548.3  | 996.6    |

**Table 5 The number of cuts and columns generated during the solution process**

| Dataset     | #Cut <sub>OPT</sub> <sup>LBBD</sup> |          | #Cut <sub>FEAS</sub> <sup>LBBD</sup> |          | #Cut <sub>OPT</sub> <sup>BD</sup> |          | #Columns |          |
|-------------|-------------------------------------|----------|--------------------------------------|----------|-----------------------------------|----------|----------|----------|
|             | Mean                                | CI width | Mean                                 | CI width | Mean                              | CI width | Mean     | CI width |
| EUNETWORKS5 | 121.8                               | 35.3     | 27.3                                 | 11.2     | 33.0                              | 11.6     | 408.8    | 180.2    |
| EUNETWORKS6 | 566.8                               | 273.0    | 84.0                                 | 30.5     | 79.2                              | 43.0     | 951.2    | 375.3    |
| EUNETWORKS7 | 361.2                               | 101.1    | 66.3                                 | 44.1     | 76.8                              | 36.8     | 1350.8   | 565.1    |
| EUNETWORKS8 | 463.7                               | 114.1    | 88.3                                 | 29.0     | 170.8                             | 62.0     | 3693.8   | 1120.1   |
| EUNETWORKS9 | 919.2                               | 605.7    | 119.3                                | 104.5    | 480.7                             | 464.9    | 7318.7   | 4824.6   |
| NEXTGEN5    | 218.3                               | 136.2    | 59.2                                 | 23.6     | 35.3                              | 28.4     | 45.5     | 0.9      |
| NEXTGEN6    | 237.5                               | 167.3    | 42.7                                 | 25.4     | 115.8                             | 43.8     | 159.8    | 162.7    |
| NEXTGEN7    | 267.7                               | 130.6    | 61.5                                 | 40.4     | 220.5                             | 50.3     | 274.8    | 411.2    |
| NEXTGEN8    | 434.3                               | 148.6    | 66.0                                 | 31.4     | 386.2                             | 164.1    | 1405.5   | 646.1    |
| NEXTGEN9    | 622.3                               | 317.5    | 103.7                                | 32.8     | 666.5                             | 405.6    | 1456.2   | 991.8    |
| PIONIER5    | 289.0                               | 96.7     | 76.0                                 | 20.5     | 110.0                             | 73.0     | 741.5    | 462.9    |
| PIONIER6    | 666.8                               | 159.0    | 124.8                                | 36.9     | 308.2                             | 70.9     | 2101.8   | 1108.5   |
| SAGO5       | 476.8                               | 185.9    | 78.3                                 | 36.1     | 232.7                             | 165.6    | 1026.8   | 691.0    |
| SAGO6       | 307.7                               | 161.8    | 37.0                                 | 17.9     | 365.5                             | 260.5    | 1024.3   | 582.1    |
| SAVVIS5     | 215.8                               | 83.0     | 50.0                                 | 29.9     | 176.0                             | 107.9    | 57.0     | 0.0      |
| SAVVIS6     | 343.3                               | 137.5    | 72.2                                 | 13.6     | 219.0                             | 83.0     | 57.0     | 0.0      |
| SAVVIS7     | 375.7                               | 320.2    | 65.2                                 | 42.6     | 661.0                             | 728.0    | 57.0     | 0.0      |
| VISIONNET5  | 385.5                               | 322.0    | 63.3                                 | 43.9     | 136.7                             | 53.6     | 1772.0   | 1091.4   |
| VISIONNET6  | 571.3                               | 328.8    | 115.8                                | 53.0     | 411.5                             | 102.8    | 4607.8   | 1571.0   |

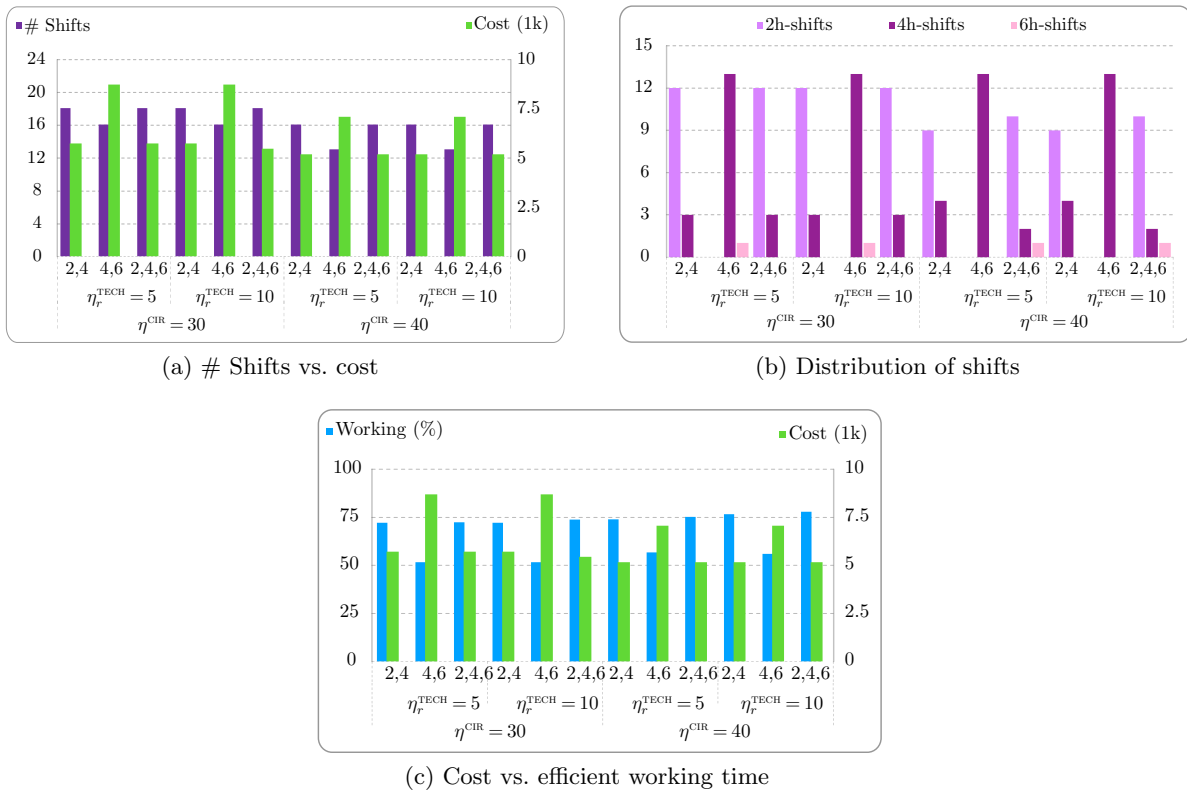

Figure 1 Cost analysis for Sago

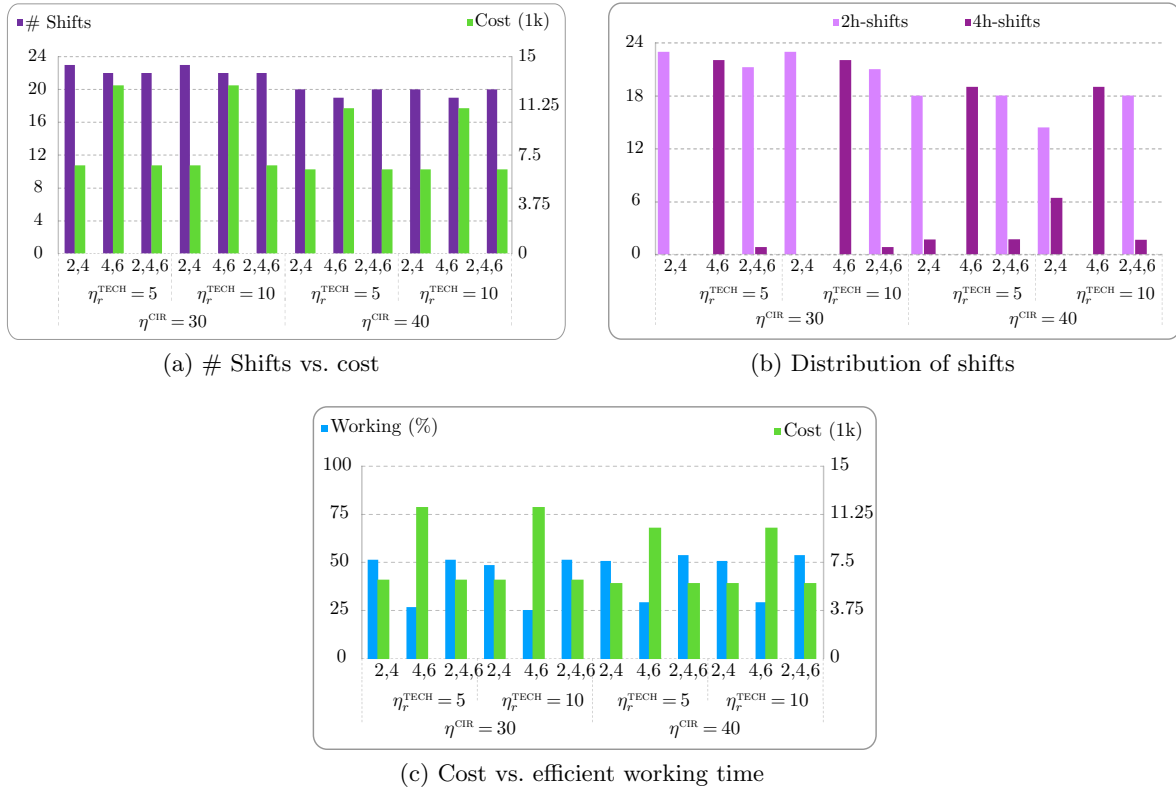

Figure 2 Cost analysis for Savvis
